# Supplementary material for: Preschool Anxiety Disorders Predict Different Patterns of Amygdala-Prefrontal Connectivity at School-Age
Source: PubMed Central journal article supplement (PMC4308069; doi:10.1371/journal.pone.0116854), 2015-01-27
Supplement: pone.0116854.s004.pdf [file pone.0116854.s004.pdf]

**Supplementary Table S1.** Complete region of interest results

| Regions                  | MNI Coordinates | Max Percent Signal Change - Unadjusted Mean (standard deviation) |                         |                  |                  |                  | Adjusted p-values Simple Model |         |         |         |       |
|--------------------------|-----------------|------------------------------------------------------------------|-------------------------|------------------|------------------|------------------|--------------------------------|---------|---------|---------|-------|
|                          |                 | (1) Non-Anxious<br>N=23                                          | (2) Any Anxiety<br>N=22 | (3) GAD<br>N=15* | (4) SAD<br>N=10* | (5) SOC<br>N=11* | 1 vs. 2                        | 1 vs. 3 | 1 vs. 4 | 1 vs. 5 |       |
| <b>Angry Faces</b>       |                 |                                                                  |                         |                  |                  |                  |                                |         |         |         |       |
| Amygdala <sup>1</sup>    | L               | -20, -6, -15                                                     | 0.88 (0.68)             | 0.80 (0.52)      | 0.85 (0.52)      | 0.80 (0.65)      | 0.69 (0.42)                    | 0.398   | 0.425   | 0.527   | 0.200 |
|                          | R               | 20, -4, -15                                                      | 1.12 (0.77)             | 0.90 (0.72)      | 0.93 (0.70)      | 0.95 (0.82)      | 0.98 (0.77)                    | 0.147   | 0.160   | 0.476   | 0.338 |
| vmPFC <sup>3</sup>       | M               | 0, 38, -18                                                       | 2.46 (1.86)             | 2.01 (1.87)      | 2.03 (1.78)      | 2.22 (2.34)      | 1.85 (1.92)                    | 0.688   | 0.692   | 0.993   | 0.503 |
|                          | R               | 6, 40, -22                                                       | 3.18 (2.71)             | 3.06 (2.87)      | 3.17 (2.92)      | 2.93 (2.85)      | 2.54 (2.99)                    | 0.522   | 0.709   | 0.449   | 0.417 |
| Lateral OFC <sup>2</sup> | L               | -24, 28, -14                                                     | 1.18 (1.10)             | 1.04 (0.86)      | 1.11 (0.82)      | 0.72 (0.66)      | 0.75 (0.81)                    | 0.787   | 0.875   | 0.212   | 0.244 |
|                          | R               | 26, 24, -22                                                      | 2.70 (2.03)             | 2.76 (2.24)      | 2.98 (2.32)      | 3.05 (2.49)      | 2.04 (1.88)                    | 0.900   | 0.884   | 0.958   | 0.261 |
| dIPFC <sup>1</sup>       | L               | -42, 13, 27                                                      | 0.47 (0.39)             | 0.34 (0.27)      | 0.36 (0.29)      | 0.30 (0.28)      | 0.28 (0.25)                    | 0.041   | 0.085   | 0.057   | 0.001 |
|                          | R               | 48, 17, 29                                                       | 0.99 (0.93)             | 0.95 (1.30)      | 1.11 (1.50)      | 0.52 (0.48)      | 0.65 (0.45)                    | 0.755   | 0.981   | 0.115   | 0.134 |
| vIPFC <sup>1</sup>       | L               | -42, 25, 3                                                       | 0.62 (0.53)             | 0.51 (0.51)      | 0.54 (0.58)      | 0.67 (0.69)      | 0.43 (0.35)                    | 0.827   | 0.921   | 0.439   | 0.038 |
|                          | R               | 42, 25, 3                                                        | 0.56 (0.43)             | 0.51 (0.36)      | 0.50 (0.41)      | 0.44 (0.46)      | 0.48 (0.25)                    | 0.499   | 0.585   | 0.353   | 0.008 |
| rACC <sup>1</sup>        | R               | 4, 47, 7                                                         | 0.48 (0.56)             | 0.46 (0.55)      | 0.39 (0.53)      | 0.36 (0.58)      | 0.56 (0.55)                    | 0.727   | 0.595   | 0.725   | 0.621 |
| dmPFC <sup>4</sup>       | R               | 10, 54, 18                                                       | 0.48 (0.36)             | 0.57 (0.57)      | 0.53 (0.56)      | 0.47 (0.65)      | 0.82 (0.53)                    | 0.586   | 0.362   | 0.390   | 0.001 |
| <b>Fearful Faces</b>     |                 |                                                                  |                         |                  |                  |                  |                                |         |         |         |       |
| Amygdala <sup>1</sup>    | L               | -20, -6, -15                                                     | 0.70 (0.60)             | 0.87 (0.77)      | 1.03 (0.85)      | 0.89 (0.96)      | 0.68 (0.53)                    | 0.135   | 0.071   | 0.243   | 0.845 |
|                          | R               | 20, -4, -15                                                      | 0.96 (0.70)             | 1.00 (0.74)      | 1.13 (0.76)      | 1.16 (0.96)      | 1.11 (0.78)                    | 0.613   | 0.412   | 0.307   | 0.964 |
| vmPFC <sup>3</sup>       | M               | 0, 38, -18                                                       | 2.28 (1.90)             | 1.54 (1.40)      | 1.21 (1.01)      | 1.34 (1.13)      | 2.14 (1.60)                    | 0.228   | 0.022   | 0.066   | 0.924 |
|                          | R               | 6, 40, -22                                                       | 3.42 (2.90)             | 2.29 (2.00)      | 2.14 (2.09)      | 2.17 (2.39)      | 2.72 (1.84)                    | 0.309   | 0.358   | 0.237   | 0.204 |
| Lateral OFC <sup>2</sup> | L               | -24, 28, -14                                                     | 1.31 (1.27)             | 1.21 (1.43)      | 1.23 (1.53)      | 1.09 (1.81)      | 0.87 (0.94)                    | 0.377   | 0.350   | 0.580   | 0.406 |
|                          | R               | 26, 24, -22                                                      | 2.43 (1.78)             | 2.83 (1.85)      | 3.05 (2.04)      | 2.86 (2.04)      | 1.84 (1.25)                    | 0.406   | 0.283   | 0.435   | 0.402 |
| dIPFC <sup>1</sup>       | L               | -42, 13, 27                                                      | 0.41 (0.37)             | 0.40 (0.42)      | 0.49 (0.43)      | 0.34 (0.41)      | 0.27 (0.28)                    | 0.851   | 0.549   | 0.716   | 0.145 |
|                          | R               | 48, 17, 29                                                       | 0.92 (1.18)             | 0.89 (0.84)      | 1.03 (0.92)      | 0.71 (0.67)      | 0.67 (0.40)                    | 0.647   | 0.731   | 0.458   | 0.172 |
| vIPFC <sup>1</sup>       | L               | -42, 25, 3                                                       | 0.39 (0.42)             | 0.45 (0.57)      | 0.53 (0.62)      | 0.54 (0.77)      | 0.37 (0.42)                    | 0.394   | 0.330   | 0.267   | 0.860 |
|                          | R               | 42, 25, 3                                                        | 0.41 (0.38)             | 0.51 (0.45)      | 0.57 (0.51)      | 0.45 (0.62)      | 0.49 (0.36)                    | 0.257   | 0.130   | 0.546   | 0.989 |
| rACC <sup>1</sup>        | R               | 4, 47, 7                                                         | 0.45 (0.58)             | 0.56 (0.57)      | 0.57 (0.58)      | 0.45 (0.68)      | 0.61 (0.51)                    | 0.447   | 0.384   | 0.801   | 0.761 |
| dmPFC <sup>4</sup>       | R               | 10, 54, 18                                                       | 0.43 (0.43)             | 0.51 (0.41)      | 0.55 (0.44)      | 0.56 (0.53)      | 0.52 (0.33)                    | 0.453   | 0.345   | 0.369   | 0.581 |

**References**

1. Sabatinelli D, Fortune EE, Li Q, Siddiqui A, Krafft C, Oliver WT, et al. Emotional perception: meta-analyses of face and natural scene processing. *Neuroimage*. 2011;54(3):2524-33.
2. Banks SJ, Eddy KT, Angstadt M, Nathan PJ, Phan KL. Amygdala-frontal connectivity during emotion regulation. *Soc Cogn Affect Neurosci*. 2007;2(4):303-12.
3. Diekhof EK, Geier K, Falkai P, Gruber O. Fear is only as deep as the mind allows: a coordinate-based meta-analysis of neuroimaging studies on the regulation of negative affect. *Neuroimage*. 2011;58(1):275-85.
4. Thayer JF, Ahs F, Fredrikson M, Sollers JJ, 3rd, Wager TD. A meta-analysis of heart rate variability and neuroimaging studies: implications for heart rate variability as a marker of stress and health. *Neuroscience and biobehavioral reviews*. 2012;36(2):747-56

\* Due to comorbidity, some individuals are represented in more than one anxious sub-group

All models account for (1) scanner, (2) sex, (3) race, (4) age at scan, (5) IQ, and (6) current emotional symptom scale score.

Key: GAD = Generalized Anxiety Disorder; SAD = Separation Anxiety Disorder; SoPh = Social Phobia; vmPFC = ventromedial Prefrontal Cortex; OFC =
