# Supplementary material for: Preschool Anxiety Disorders Predict Different Patterns of Amygdala-Prefrontal Connectivity at School-Age
Source: PubMed Central journal article supplement (PMC4308069; doi:10.1371/journal.pone.0116854), 2015-01-27
Supplement: pone.0116854.s005.pdf [file pone.0116854.s005.pdf]

Supplementary Table S2. Negative Connectivity with the Amygdala

| Main Cluster                                                                | Local Maxima                      | BA | X   | Y   | Z   | Max Z | Size | Corrected p-value | Main Cluster                                                                 | Local Maxima       | BA                                          | X | Y   | Z   | Max Z | Size | Corrected p-value |          |          |
|-----------------------------------------------------------------------------|-----------------------------------|----|-----|-----|-----|-------|------|-------------------|------------------------------------------------------------------------------|--------------------|---------------------------------------------|---|-----|-----|-------|------|-------------------|----------|----------|
| <b>Clusters negatively connected with the left amygdala to angry faces</b>  |                                   |    |     |     |     |       |      |                   | <b>Clusters negatively connected with the right amygdala to angry faces</b>  |                    |                                             |   |     |     |       |      |                   |          |          |
| <b>Non-Anxious</b>                                                          |                                   |    |     |     |     |       |      |                   | <b>SoPh&gt;SAD</b>                                                           |                    |                                             |   |     |     |       |      |                   |          |          |
|                                                                             | Orbital Frontal Cortex            | R  | 47  | 25  | 21  | -26   | 5    | 140778            | 1.45E-12                                                                     |                    | Frontal Pole                                | R | 15  | 57  | 21    | 5.16 | 19174             | 0.0116   |          |
|                                                                             | Orbital Frontal Cortex            | R  | 23  | 20  | -24 | 4.88  |      |                   |                                                                              |                    | Frontal Pole                                | R | 10  | 58  | 29    | 4.84 |                   |          |          |
|                                                                             | Orbital Frontal Cortex            | R  | 1   | 28  | 26  | -24   | 4.68 |                   |                                                                              |                    | Frontal Pole                                | R | 9   | 59  | 22    | 4.71 |                   |          |          |
|                                                                             | Orbital Frontal Cortex            | R  | 11  | 30  | 27  | -24   | 4.59 |                   |                                                                              |                    | Frontal Pole                                | R | 8   | 62  | 15    | 4.63 |                   |          |          |
|                                                                             | Frontal Medial Cortex             | L  | -5  | 39  | -19 | 4.5   |      |                   |                                                                              |                    | Frontal Pole                                | R | 14  | 63  | 14    | 4.58 |                   |          |          |
|                                                                             | Brainstem                         | L  | -2  | -12 | -17 | 4.5   |      |                   |                                                                              |                    | Frontal Pole                                | L | -26 | 63  | 15    | 4.43 |                   |          |          |
| <b>GAD</b>                                                                  |                                   |    |     |     |     |       |      |                   | <b>Non-Anxious &gt; SAD</b>                                                  |                    |                                             |   |     |     |       |      |                   |          |          |
|                                                                             | None                              |    |     |     |     |       |      |                   |                                                                              |                    | Anterior Cingulate Gyrus, dorsal            | R | 5   | 20  | 18    | 4.6  | 90284             | 2.67E-09 |          |
|                                                                             |                                   |    |     |     |     |       |      |                   |                                                                              |                    | Caudate                                     | R | 14  | 15  | 10    | 4.29 |                   |          |          |
|                                                                             |                                   |    |     |     |     |       |      |                   |                                                                              |                    | Frontal Medial Cortex                       | R | 9   | 37  | -9    | 4.19 |                   |          |          |
| <b>SAD</b>                                                                  |                                   |    |     |     |     |       |      |                   | <b>Non-Anxious &gt; SoPh</b>                                                 |                    |                                             |   |     |     |       |      |                   |          |          |
|                                                                             | None                              |    |     |     |     |       |      |                   |                                                                              |                    | Subcallosal Cortex                          | L | -9  | 29  | -20   | 4.11 | 15562             | 0.0342   |          |
| <b>SoPh</b>                                                                 |                                   |    |     |     |     |       |      |                   | <b>Non-Anxious &gt; SAD</b>                                                  |                    |                                             |   |     |     |       |      |                   |          |          |
|                                                                             | None                              |    |     |     |     |       |      |                   |                                                                              |                    | Orbital Frontal Cortex                      | R | 47  | 37  | 34    | -23  | 3.88              |          |          |
|                                                                             |                                   |    |     |     |     |       |      |                   |                                                                              |                    | Frontal Pole                                | R | 25  | 37  | -23   | 3.87 |                   |          |          |
|                                                                             |                                   |    |     |     |     |       |      |                   |                                                                              |                    | Subcallosal Cortex                          | R | 4   | 28  | -5    | 3.83 |                   |          |          |
|                                                                             |                                   |    |     |     |     |       |      |                   |                                                                              |                    | Subcallosal Cortex                          | L | -6  | 31  | -23   | 3.79 |                   |          |          |
|                                                                             |                                   |    |     |     |     |       |      |                   |                                                                              |                    | Frontal Medial Cortex                       | L | -10 | 34  | -21   | 3.61 |                   |          |          |
| <b>Non-Anxious &gt; SAD</b>                                                 |                                   |    |     |     |     |       |      |                   | <b>Clusters negatively connected with the left amygdala to fearful faces</b> |                    |                                             |   |     |     |       |      |                   |          |          |
|                                                                             | Anterior Cingulate Gyrus, rostral | L  | 24  | -7  | 37  | 10    | 4.62 | 51080             | 6.62E-06                                                                     | <b>Non-Anxious</b> |                                             |   |     |     |       |      |                   |          |          |
|                                                                             | Anterior Cingulate Gyrus, rostral | L  | -9  | 36  | 9   | 4.56  |      |                   |                                                                              |                    | Paracingulate Gyrus                         | R | 9   | 5   | 53    | 14   | 4.49              | 282614   | 1.18E-20 |
|                                                                             | Anterior Cingulate Gyrus, dorsal  | R  | 4   | 22  | 18  | 4.44  |      |                   |                                                                              |                    | Frontal Pole                                | R | 29  | 39  | 26    | 4.46 |                   |          |          |
|                                                                             | Anterior Cingulate Gyrus, rostral | L  | -10 | 38  | 3   | 4.39  |      |                   |                                                                              |                    | Frontal Pole                                | R | 24  | 63  | 13    | 4.45 |                   |          |          |
|                                                                             | Anterior Cingulate Gyrus, rostral | L  | -7  | 40  | 4   | 4.36  |      |                   |                                                                              |                    | Lateral Occipital Cortex, inferior division | L | 19  | -55 | -69   | 13   | 4.43              |          |          |
|                                                                             | Anterior Cingulate Gyrus, dorsal  | R  | 24  | 5   | 19  | 20    | 4.23 |                   |                                                                              |                    | Frontal Pole                                | R | 45  | 40  | -10   | 4.41 |                   |          |          |
|                                                                             |                                   |    |     |     |     |       |      |                   |                                                                              |                    | Frontal Pole                                | R | 41  | 51  | -6    | 4.39 |                   |          |          |
| <b>Non-Anxious &gt; SoPh</b>                                                |                                   |    |     |     |     |       |      |                   | <b>GAD</b>                                                                   |                    |                                             |   |     |     |       |      |                   |          |          |
|                                                                             | Temporal Pole/Amygdala            | R  | 28  | 27  | 4   | -26   | 5.35 | 15048             | 0.0453                                                                       |                    | None                                        |   |     |     |       |      |                   |          |          |
|                                                                             | Orbital Frontal Cortex            | R  | 22  | 21  | -24 | 4.02  |      |                   |                                                                              | <b>SAD</b>         |                                             |   |     |     |       |      |                   |          |          |
|                                                                             | Frontal Medial Cortex             | L  | -4  | 39  | -19 | 3.64  |      |                   |                                                                              |                    | None                                        |   |     |     |       |      |                   |          |          |
|                                                                             | Orbital Frontal Cortex            | R  | 47  | 36  | 35  | -23   | 3.64 |                   |                                                                              | <b>SoPh</b>        |                                             |   |     |     |       |      |                   |          |          |
|                                                                             | Orbital Frontal Cortex            | R  | 47  | 34  | 34  | -23   | 3.64 |                   |                                                                              |                    | Lateral Occipital Cortex, superior division | R | 12  | -61 | 72    | 3.89 | 24424             | 0.00309  |          |
|                                                                             | Frontal Pole                      | R  | 26  | 36  | -23 | 3.6   |      |                   |                                                                              |                    | Lateral Occipital Cortex, superior division | R | 12  | -63 | 73    | 3.88 |                   |          |          |
| <b>Clusters negatively connected with the right amygdala to angry faces</b> |                                   |    |     |     |     |       |      |                   | <b>Non-Anxious &gt; SAD</b>                                                  |                    |                                             |   |     |     |       |      |                   |          |          |
| <b>Non-Anxious</b>                                                          |                                   |    |     |     |     |       |      |                   | <b>Non-Anxious &gt; GAD</b>                                                  |                    |                                             |   |     |     |       |      |                   |          |          |
|                                                                             | Subcallosal Cortex                | R  | 24  | 4   | 33  | -10   | 4.55 | 135068            | 1.78E-12                                                                     |                    | Frontal Pole                                | R | 27  | 55  | 0     | 3.81 | 27106             | 0.00153  |          |
|                                                                             | Subcallosal Cortex                | L  | -9  | 29  | -20 | 4.43  |      |                   |                                                                              |                    | Frontal Pole                                | R | 33  | 53  | 19    | 3.74 |                   |          |          |
|                                                                             | Frontal Pole                      | L  | -36 | 41  | -20 | 4.37  |      |                   |                                                                              |                    | Frontal Pole                                | R | 10  | 27  | 57    | 20   | 3.72              |          |          |
|                                                                             | Subcallosal Cortex                | R  | 10  | 30  | -11 | 4.25  |      |                   |                                                                              |                    | Frontal Pole                                | R | 24  | 55  | 11    | 3.67 |                   |          |          |
|                                                                             | Subcallosal Cortex                | R  | 24  | 4   | 26  | -9    | 4.17 |                   |                                                                              |                    | Frontal Pole                                | R | 30  | 53  | 11    | 3.63 |                   |          |          |
|                                                                             | Orbital Frontal Cortex            | R  | 11  | 23  | -20 | 4.13  |      |                   |                                                                              |                    | Frontal Pole                                | R | 26  | 54  | 2     | 3.62 |                   |          |          |
| <b>GAD</b>                                                                  |                                   |    |     |     |     |       |      |                   | <b>SoPh</b>                                                                  |                    |                                             |   |     |     |       |      |                   |          |          |
|                                                                             | None                              |    |     |     |     |       |      |                   |                                                                              |                    | Frontal Pole                                | R | 9   | 9   | 59    | 30   | 3.89              | 20065    | 0.00892  |
| <b>SAD</b>                                                                  |                                   |    |     |     |     |       |      |                   | <b>Non-Anxious &gt; SoPh</b>                                                 |                    |                                             |   |     |     |       |      |                   |          |          |
|                                                                             | None                              |    |     |     |     |       |      |                   |                                                                              |                    | Inferior Frontal Gyrus, pars triangul       | R | 53  | 31  | 11    | 3.58 |                   |          |          |
|                                                                             |                                   |    |     |     |     |       |      |                   |                                                                              |                    | Inferior Frontal Gyrus, pars triangul       | R | 55  | 30  | 12    | 3.5  |                   |          |          |
|                                                                             |                                   |    |     |     |     |       |      |                   |                                                                              |                    | Frontal Pole                                | L | 9   | -15 | 64    | 22   | 3.4               |          |          |
|                                                                             |                                   |    |     |     |     |       |      |                   |                                                                              |                    | Frontal Pole                                | R | 36  | 54  | 21    | 3.31 |                   |          |          |
|                                                                             |                                   |    |     |     |     |       |      |                   |                                                                              |                    | Frontal Pole                                | R | 18  | 49  | 21    | 3.3  |                   |          |          |
|                                                                             |                                   |    |     |     |     |       |      |                   |                                                                              |                    | Frontal Pole                                | R | 13  | 43  | 45    | 3.28 | 14863             | 0.0425   |          |
|                                                                             |                                   |    |     |     |     |       |      |                   |                                                                              |                    | Frontal Pole                                | R | 19  | 46  | 39    | 3.28 |                   |          |          |
|                                                                             |                                   |    |     |     |     |       |      |                   |                                                                              |                    | Frontal Pole                                | R | 15  | 43  | 51    | 3.26 |                   |          |          |
|                                                                             |                                   |    |     |     |     |       |      |                   |                                                                              |                    | Superior Frontal Gyrus                      | R | 7   | 25  | 56    | 3.2  |                   |          |          |
|                                                                             |                                   |    |     |     |     |       |      |                   |                                                                              |                    | Frontal Pole                                | R | 18  | 51  | 39    | 3.16 |                   |          |          |
|                                                                             |                                   |    |     |     |     |       |      |                   |                                                                              |                    | Superior Frontal Gyrus                      | L | -9  | 36  | 49    | 3.13 |                   |          |          |
