# Supplementary material for: Preschool Anxiety Disorders Predict Different Patterns of Amygdala-Prefrontal Connectivity at School-Age
Source: PubMed Central journal article supplement (PMC4308069; doi:10.1371/journal.pone.0116854), 2015-01-27
Supplement: pone.0116854.s006.pdf [file pone.0116854.s006.pdf]

Supplementary Table S3. Positive Connectivity with the Amygdala

| Main Cluster                                                               | BA | X   | Y   | Z   | Max Z | Size  | Corrected p-value | Main Cluster                                                                | BA                                           | X   | Y   | Z   | Max Z | Size   | Corrected p-value |          |
|----------------------------------------------------------------------------|----|-----|-----|-----|-------|-------|-------------------|-----------------------------------------------------------------------------|----------------------------------------------|-----|-----|-----|-------|--------|-------------------|----------|
| Local Maxima                                                               |    |     |     |     |       |       |                   | Local Maxima                                                                |                                              |     |     |     |       |        |                   |          |
| <b>Clusters Positively connected with the left amygdala to angry faces</b> |    |     |     |     |       |       |                   | <b>Clusters Positively connected with the right amygdala to angry faces</b> |                                              |     |     |     |       |        |                   |          |
| <b>Non-Anxious</b>                                                         |    |     |     |     |       |       |                   | <b>Non-Anxious</b>                                                          |                                              |     |     |     |       |        |                   |          |
| Postcentral Gyrus                                                          | L  | -62 | -11 | 47  | 4.77  | 57579 | 1.79E-06          | None                                                                        |                                              |     |     |     |       |        |                   |          |
| Frontal Pole                                                               | L  | -41 | 53  | 35  | 4.74  |       |                   | GAD                                                                         |                                              |     |     |     |       |        |                   |          |
| Parahippocampal Gyrus                                                      | L  | -19 | -23 | -22 | 4.73  |       |                   | None                                                                        |                                              |     |     |     |       |        |                   |          |
| Parahippocampal Gyrus                                                      | L  | -19 | -25 | -23 | 4.65  |       |                   | SAD                                                                         |                                              |     |     |     |       |        |                   |          |
| Postcentral Gyrus                                                          | L  | -67 | -6  | 36  | 4.5   |       |                   | Frontal Pole                                                                | R                                            | 15  | 58  | 21  | 5.6   | 207305 | 6.22E-17          |          |
| Precentral Gyrus                                                           | L  | 6   | -63 | 2   | 39    | 4.42  |                   | Frontal Pole                                                                | R                                            | 9   | 59  | 22  | 5.25  |        |                   |          |
|                                                                            |    |     |     |     |       |       |                   | Frontal Pole                                                                | R                                            | 8   | 61  | 15  | 4.96  |        |                   |          |
| <b>GAD</b>                                                                 |    |     |     |     |       |       |                   | Frontal Pole                                                                | R                                            | 20  | 48  | 21  | 4.94  |        |                   |          |
| None                                                                       |    |     |     |     |       |       |                   | Frontal Pole                                                                | R                                            | 14  | 61  | 15  | 4.84  |        |                   |          |
| <b>SAD</b>                                                                 |    |     |     |     |       |       |                   | Frontal Pole                                                                | R                                            | 10  | 58  | 29  | 4.81  |        |                   |          |
| Frontal Pole                                                               | R  | 9   | 13  | 57  | 19    | 4.38  | 144063            | 8.92E-13                                                                    | Middle Temporal Gyrus, temporooccipital part | L   | -44 | -52 | 2     | 4.03   | 37257             | 0.000105 |
| Frontal Pole                                                               | R  | 14  | 63  | 20  | 4.35  |       |                   | Precuneus Cortex                                                            | R                                            | 7   | -69 | 28  | 3.99  |        |                   |          |
| Posterior Cingulate Gyrus*                                                 | L  | -19 | -16 | 39  | 4.25  |       |                   | Precuneus Cortex                                                            | R                                            | 4   | -68 | 28  | 3.92  |        |                   |          |
| Frontal Pole                                                               | R  | 9   | 9   | 59  | 20    | 4.22  |                   | Lateral Occipital Cortex, inferior division                                 | L                                            | 19  | -48 | -74 | 10    | 3.73   |                   |          |
| Frontal Pole                                                               | R  | 37  | 35  | -9  | 4.14  |       |                   | Angular Gyrus                                                               | L                                            | 39  | -61 | -56 | 32    | 3.66   |                   |          |
| Frontal Pole                                                               | R  | 3   | 61  | 23  | 4.08  |       |                   | Lateral Occipital Cortex, superior division                                 | L                                            | -50 | -69 | 16  | 3.62  |        |                   |          |
|                                                                            |    |     |     |     |       |       |                   |                                                                             |                                              |     |     |     |       |        |                   |          |
| <b>SoPh</b>                                                                |    |     |     |     |       |       |                   | <b>SoPh</b>                                                                 |                                              |     |     |     |       |        |                   |          |
| None                                                                       |    |     |     |     |       |       |                   | None                                                                        |                                              |     |     |     |       |        |                   |          |
| <b>SAD &gt; SoPh</b>                                                       |    |     |     |     |       |       |                   | <b>SAD &gt; GAD</b>                                                         |                                              |     |     |     |       |        |                   |          |
| Frontal Pole                                                               | L  | -18 | 71  | 15  | 4.18  | 39012 | 9.05E-05          | Frontal Pole                                                                | R                                            | 15  | 59  | 21  | 4.56  | 24728  | 0.00244           |          |
| Frontal Pole                                                               | R  | 18  | 59  | 30  | 4.14  |       |                   | Frontal Pole                                                                | R                                            | 9   | 59  | 22  | 4.1   |        |                   |          |
| Frontal Pole                                                               |    |     |     |     |       |       |                   | Frontal Pole                                                                | L                                            | -26 | 63  | 15  | 3.96  |        |                   |          |
| Frontal Pole                                                               | R  | 13  | 59  | 20  | 4.01  |       |                   | Frontal Pole                                                                | R                                            | 8   | 64  | 14  | 3.79  |        |                   |          |
| Frontal Pole*                                                              | L  | 46  | -52 | 45  | 23    | 3.98  |                   | Frontal Pole                                                                | R                                            | 8   | 61  | 15  | 3.75  |        |                   |          |
| Frontal Pole                                                               | L  | 46  | -49 | 46  | 23    | 3.97  |                   | Frontal Pole                                                                | L                                            | 10  | -23 | 62  | 18    | 3.67   |                   |          |
| Postcentral Gyrus                                                          | L  | -18 | -31 | 78  | 4.04  | 24144 | 0.00342           |                                                                             |                                              |     |     |     |       |        |                   |          |
| Superior Frontal Gyrus                                                     | L  | 6   | -15 | 11  | 60    | 3.69  |                   | <b>SAD &gt; SoPh</b>                                                        |                                              |     |     |     |       |        |                   |          |
| Posterior Cingulate Gyrus*                                                 | L  | -19 | -16 | 39  | 3.69  |       |                   | Frontal Pole                                                                | R                                            | 15  | 57  | 21  | 5.16  | 117621 | 2.75E-11          |          |
| Middle Frontal Gyrus*                                                      | L  | 6   | -27 | 8   | 40    | 3.57  |                   | Frontal Pole                                                                | R                                            | 10  | 58  | 29  | 4.84  |        |                   |          |
| Posterior Cingulate Gyrus*                                                 | L  | 31  | -24 | -25 | 41    | 3.53  |                   | Frontal Pole                                                                | R                                            | 9   | 59  | 22  | 4.71  |        |                   |          |
| Superior Frontal Gyrus                                                     | L  | -21 | 31  | 49  | 3.53  |       |                   | Frontal Pole                                                                | R                                            | 8   | 62  | 15  | 4.63  |        |                   |          |
|                                                                            |    |     |     |     |       |       |                   | Frontal Pole                                                                | R                                            | 14  | 63  | 14  | 4.58  |        |                   |          |
|                                                                            |    |     |     |     |       |       |                   | Frontal Pole                                                                | L                                            | -26 | 63  | 15  | 4.43  |        |                   |          |
| <b>SAD &gt; Non-Anxious</b>                                                |    |     |     |     |       |       |                   |                                                                             |                                              |     |     |     |       |        |                   |          |
| Frontal Pole                                                               | R  | 9   | 60  | 19  | 4.68  | 85995 | 9.08E-09          | <b>SAD &gt; Non-Anxious</b>                                                 |                                              |     |     |     |       |        |                   |          |
| Frontal Pole                                                               | R  | 14  | 63  | 20  | 4.67  |       |                   | Frontal Pole                                                                | R                                            | 15  | 58  | 21  | 5.43  | 123648 | 1.05E-11          |          |
| Anterior Cingulate Gyrus, rostral                                          | L  | 24  | -7  | 37  | 10    | 4.62  |                   | Frontal Pole                                                                | R                                            | 9   | 59  | 22  | 5.05  |        |                   |          |
| Frontal Pole                                                               | R  | 13  | 57  | 19  | 4.56  |       |                   | Frontal Pole                                                                | R                                            | 7   | 61  | 15  | 4.89  |        |                   |          |
| Anterior Cingulate Gyrus, rostral                                          | L  | -9  | 36  | 9   | 4.56  |       |                   | Frontal Pole                                                                | R                                            | 18  | 48  | 22  | 4.75  |        |                   |          |
| Anterior Cingulate Gyrus, dorsal                                           | R  | 4   | 22  | 18  | 4.44  |       |                   | Frontal Pole                                                                | R                                            | 21  | 44  | 22  | 4.75  |        |                   |          |
|                                                                            |    |     |     |     |       |       |                   | Frontal Pole                                                                | L                                            | -26 | 63  | 15  | 4.71  |        |                   |          |
|                                                                            |    |     |     |     |       |       |                   | Lateral Occipital Cortex, superior division                                 | L                                            | -55 | -67 | 27  | 3.83  | 20721  | 0.00739           |          |
|                                                                            |    |     |     |     |       |       |                   | Lateral Occipital Cortex, superior division                                 | L                                            | -49 | -67 | 29  | 3.83  |        |                   |          |
|                                                                            |    |     |     |     |       |       |                   | Precuneus Cortex                                                            | R                                            | 1   | -70 | 44  | 3.79  |        |                   |          |
|                                                                            |    |     |     |     |       |       |                   | Lateral Occipital Cortex, superior division                                 | L                                            | -46 | -65 | 29  | 3.74  |        |                   |          |
|                                                                            |    |     |     |     |       |       |                   | Lateral Occipital Cortex, superior division                                 | L                                            | -44 | -63 | 28  | 3.66  |        |                   |          |
|                                                                            |    |     |     |     |       |       |                   | Lateral Occipital Cortex, superior division                                 | L                                            | -49 | -66 | 32  | 3.63  |        |                   |          |
